# Supplementary material for: Prognostic value of the “dynamic” second revision of the international staging system (R2- ISS) in patients with multiple myeloma undergoing anti-CD38 antibody, carfilzomib, and dexamethasone therapy
Source: Research Square preprint supplement (doi:10.21203/rs.3.rs-4113413/v1), 2024-03-21
Supplement: Supplementary file 1 [file 315db83388b7b1e83c715e63.xlsx]

## Sheet: Table3
Table 3. Factors affecting progression-free survival and overall survival in multivariate analysis
		Progression-free survival				Overall survival
	Hazard Ratio	95% CI	P values		Hazard Ratio	95% CI	P values
Variables
Progressive disease	2.08	0.79-5.45	0.14		0.83	0.20-3.40	0.79
Triple-class refractorya)	2.14	0.87-5.26	0.10		2.17	0.53-8.88	0.28
Dynamic R2-ISS	2.3	1.30-4.06	0.0041		3.10	1.21-7.96	0.019
R2-ISS: the second revision of the international staging system, NR: not reached aTriple-class refractory was defined as refractory to PIs, IMIDs, and daratumumab.
