# Supplementary material for: Prognostic value of the “dynamic” second revision of the international staging system (R2- ISS) in patients with multiple myeloma undergoing anti-CD38 antibody, carfilzomib, and dexamethasone therapy
Source: Research Square preprint supplement (doi:10.21203/rs.3.rs-4113413/v1), 2024-03-21
Supplement: Supplementary file 2 [file 78f44a5cde87b519b9b92351.xlsx]

## Sheet: Total (2)
Table 1. Patient characteristics
Variable	N = 60
Age (years), median (range) at treatment	61 (39–78)
Sex, n (%)
Female	25 (41.7)
Male	35 (58.3)
MM subtype, n (%)
IgG	34 (56.7)
IgA	9 (15.0)
IgD	1 (1.7)
IgM	2 (3.3)
Bence-Jones	14 (23.3)
R2-ISS stage at diagnosis, n (%)
Stage I	2 (3.3)
Stage II	2 (3.3)
Stage III	20 (33.3)
Stage IV	10 (16.7)
Unknown	26 (43.3)
R2-ISS stage at treatment, n (%)
Stage I	10 (16.7)
Stage II	11 (18.3)
Stage III	23 (38.3)
Stage IV	9 (15.0)
Unknown	7 (11.7)
Previous treatment lines, median (range) at treatment	1 (1–9)
Progressive disease at treatment, n (%)
Yes	34 (56.7)
No	26 (43.3)
Triple-class refractorya
Yes	16 (26.7)
No	44 (73.3)
Anti-CD38 antibody refractory
Yes	39 (65.0)
No	21 (35.0)
High-risk cytogenetic abnormality until treatment
High-risk	29 (48.3)
del(17p)	18 (30.0)
t(4;14)	21 (35.0)
t(14;16)	0 (0.0)
Standard-risk	29 (48.3)
Unknown	2 (3.3)
1q gain / amplification	38 (63.3)
1q amplification	25 (44.6)
ASCT: autologous stem cell transplantation; Ig: immunoglobulin; R2-ISS: the second revision of International Scoring System; LDH: lactate dehydrogenase; MM: multiple myeloma.
aTriple-class refractory was defined as refractory to proteasome inhibitors, immunomodulatory drugs, and daratumumab.
