# Supplementary material for: Prognostic value of the “dynamic” second revision of the international staging system (R2- ISS) in patients with multiple myeloma undergoing anti-CD38 antibody, carfilzomib, and dexamethasone therapy
Source: Research Square preprint supplement (doi:10.21203/rs.3.rs-4113413/v1), 2024-03-21
Supplement: Supplementary file 3 [file 7b8e86e281317683fdf37ade.xlsx]

## Sheet: Sheet1
Table 2. Factors affecting progression-free survival and overall survival in univariate analysis
			Progression-free survival				Overall survival
			Median (months)	95% CI	P values		Median (months)	95% CI	P values
Variables		N
HRCA	No	29	30.4	5.6-NR	0.25		NR	NR-NR	0.32
	Yes	29	16.1	5.7-20.7			NR	14.6-NR
Deletion 17p	No	42	30.4	7.6-NR	0.22		NR	NR-NR	0.48
	Yes	18	20.2	3.0-NR			17.3	14.6-NR
1q gain / amplification	No	18	30.4	11.6-NR	0.019		NR	NR-NR	0.00071
	Yes	38	16.1	5.7-NR			NR	14.6-NR
1q amplification	No	31	30.4	20.2-NR	0.00022		NR	NR-NR	< 0.0001
	Yes	25	5.7	3.0-16.1			14.6	11.7-NR
1q abnormality + HRCA	No	16	30.4	11.6-NR	0.011		NR	NR-NR	0.017
	Yes	42	16.1	5.7-20.7			NR	14.6-NR
Progressive disease	No	26	NR	20.2-NR	0.078		NR	17.3-NR	0.69
	Yes	34	11.6	4.8-NR			NR	16.6-NR
Anti-CD38 antibody refractory	Sensitive	39	30.4	NR-NR	0.00082		NR	NR-NR	0.019
	Refractory	21	5.7	3.0-20.2			NR	12.2-NR
Triple-class refractorya)	No	44	30.4	NR-NR	< 0.0001		NR	NR-NR	0.016
	Yes	16	4.8	2.1-20.2			NR	7.9-NR
R2-ISS (at diagnosis)	I	2	NR	NR-NR	0.4		NR	NR-NR	0.82
	II	2	NR	NR-NR			NR	NR-NR
	III	20	11.6	4.4-NR			NR	12.2-NR
	Unknown	20	20.2	1.5-NR			NR	7.8-NR
Dynamic R2-ISS	I	10	30.4	3.9-NR	0.00011		NR	NR-NR	0.023
	II	11	NR	5.6-NR			NR	NR-NR
	III	23	20.2	5.7-NR			NR	16.6-NR
	IV	9	4.4	1.6-7.6			14.6	2.8-NR
Transition in R2-ISS from diagnosis to anti-CD38 antibody + Kd	Improved	13	20.2	5.7-NR	0.0041		NR	NR-NR	0.10
	Maintain	15	NR	4.8-NR			NR	12.2-NR
	Worsened	4	3.6	1.6-NR			14.5	11.7-NR
HR: high-risk cytogenetic abnormailties, R2-ISS: the second revision of the international staging system, NR: not reached, Kd: carfilzomib + dexamethasone aTriple-class refractory was defined as refractory to proteasome inhibitors, immunomodulatory drugs, and daratumumab. bHRCA included del (17p), t(4;14), and t(14;16).
